# Supplementary material
Source: PubMed Central journal article supplement (PMC3422645)
Supplement: NIHMS394878-supplement-Table_S1.pdf [file NIHMS394878-supplement-Table_S1.pdf]

SUPPLEMENTARY MATERIAL

Table S1. Strains and plasmids used in this study.

| Name                      | Description                                                                                                                                                                                                                                                                                    | Reference                                      |
|---------------------------|------------------------------------------------------------------------------------------------------------------------------------------------------------------------------------------------------------------------------------------------------------------------------------------------|------------------------------------------------|
| <i>Bordetella</i> strains |                                                                                                                                                                                                                                                                                                |                                                |
| Bp536                     | Wild type <i>B. pertussis</i>                                                                                                                                                                                                                                                                  | (Relman <i>et al.</i> , 1989)                  |
| Bpe138                    | Bp536 containing a gene conferring Cm <sup>r</sup> in place of <i>fhaB</i>                                                                                                                                                                                                                     | (Inatsuka <i>et al.</i> , 2005)                |
| Bpe138::pSJ63             | Bp138 with plasmid pSJ63 integrated at the 5' region of <i>fhaB</i> ; this strain expresses <i>fhaB</i> <sub>Bb</sub>                                                                                                                                                                          | This study                                     |
| Bpe129                    | Bp536 containing nucleotide substitutions in <i>fhaB</i> that result in the production of FHA with alanine substituted for glycine at amino acid position 1098 (i.e., RGD -> RAD)                                                                                                              | (Ishibashi <i>et al.</i> , 2001)               |
| RB50                      | Wild type <i>B. bronchiseptica</i>                                                                                                                                                                                                                                                             | (Cotter & Miller, 1994)                        |
| RBX9                      | $\Delta fhaB$ derivative of RB50                                                                                                                                                                                                                                                               | (Cotter <i>et al.</i> , 1998)                  |
| RBX11                     | $\Delta fhaS$ derivative of RB50                                                                                                                                                                                                                                                               | (Julio & Cotter, 2005)                         |
| RBX20                     | $\Delta fhaB \Delta fhaS$ derivative of RB50                                                                                                                                                                                                                                                   | (Julio & Cotter, 2005)                         |
| RBX20::pSJ61              | RBX20 with pSJ61 integrated at the 5' region of <i>fhaB</i> ; this strain expresses <i>fhaB</i> <sub>Bb</sub>                                                                                                                                                                                  | This study                                     |
| RB50gap                   | RB50 containing an in-frame deletion of nucleotides 1449 – 1788 of <i>fhaB</i>                                                                                                                                                                                                                 | This study                                     |
| RB50CRD <sub>Bp</sub>     | RB50 in which nucleotides 3764-4178 of <i>fhaB</i> <sub>Bb</sub> were replaced with nucleotides 3422-3836 from <i>fhaB</i> <sub>Bp</sub>                                                                                                                                                       | This study                                     |
| RB50NMCD <sub>Bp</sub>    | RB50 in which nucleotides 5305-6366 of <i>fhaB</i> <sub>Bb</sub> were replaced with nucleotides 4961-6036 from <i>fhaB</i> <sub>Bp</sub>                                                                                                                                                       | This study                                     |
| RBX11-T-E                 | RBX11 containing a stop codon immediately following codon 3371 of <i>fhaB</i>                                                                                                                                                                                                                  | (Mazar & Cotter, 2006)                         |
| RBFS4                     | RB50 in which <i>fhaB</i> <sub>Bb</sub> was replaced with <i>fhaB</i> <sub>Bp</sub> . This <i>fhaB</i> <sub>Bp</sub> allele contains an additional thymidine at position 7127, resulting in 42 different codons (compared with wild type <i>fhaB</i> <sub>Bp</sub> ) followed by a stop codon. | (Inatsuka <i>et al.</i> , 2005) and this study |
| RBFS10                    | RB50 in which <i>fhaB</i> <sub>Bb</sub> was replaced with <i>fhaB</i> <sub>Bp</sub> ; constructed by repairing the frame-shift mutation in RBFS4                                                                                                                                               | This study                                     |
| RB50RAE                   | RB50 containing nucleotide substitutions in <i>fhaB</i> that result in alanine and glutamic acid replacing glycine and aspartic acid at amino                                                                                                                                                  | This study                                     |

SUPPLEMENTARY MATERIAL

|                        |                                                                                                                                                        |                            |
|------------------------|--------------------------------------------------------------------------------------------------------------------------------------------------------|----------------------------|
|                        | acid positions 1213 and 1214, respectively, i.e., RGD -> RAE                                                                                           |                            |
| RBX11Δ28               | RBX11 containing a deletion of nucleotides 7287 – 7368 in <i>fhaB</i>                                                                                  | This study                 |
| <i>E. coli</i> strains |                                                                                                                                                        |                            |
| DH5α                   | Molecular cloning strain                                                                                                                               | BRL; Gaithersburg, MD      |
| SM10λpir               | Conjugation strain                                                                                                                                     | (Miller & Mekalanos, 1988) |
| Plasmid name           |                                                                                                                                                        |                            |
| pSJ61                  | pBR322-based <i>Bordetella</i> suicide vector containing the <i>fhaB</i> gene and promoter from <i>B. bronchiseptica</i>                               | This study                 |
| pSJ63                  | pSJ61 in which the <i>fhaB</i> <sub>Bb</sub> promoter and first 70 codons were replaced with the corresponding region from <i>fhaB</i> <sub>Bp</sub> . | This study                 |

- Cotter, P. A. & J. F. Miller (1994) Bvgas-mediated signal transduction: Analysis of phase-locked regulatory mutants of *bordetella bronchiseptica* in a rabbit model. *Infect. Immun.* **62**: 3381-3390.
- Cotter, P. A., M. H. Yuk, S. Mattoo, B. J. Akerley, J. Boschwitz, D. A. Relman, *et al.* (1998) The filamentous hemagglutinin (*fha*) of *bordetella bronchiseptica* is required for efficient establishment of tracheal colonization. *Infect. Immun.* **66**: 5921-5929.
- Inatsuka, C. S., S. M. Julio & P. A. Cotter (2005) *Bordetella* filamentous hemagglutinin plays a critical role in immunomodulation, suggesting a mechanism for host specificity. *Proc. Natl. Acad. Sci.* **102**: 18578-18583.
- Ishibashi, Y., D. A. Relman & A. Nishikawa (2001) Invasion of human respiratory epithelial cells by *bordetella pertussis*: Possible role for a filamentous hemagglutinin arg-gly-asp sequence and alpha5beta1 integrin. *Microb Pathog* **30**: 279-288.
- Julio, S. M. & P. A. Cotter (2005) Characterization of the filamentous hemagglutinin-like protein *fhas* in *bordetella bronchiseptica*. *Infect Immun* **73**: 4960-4971.
- Mazar, J. & P. A. Cotter (2006) Topology and maturation of filamentous haemagglutinin suggest a new model for two-partner secretion. *Mol Microbiol* **62**: 641-654.
- Miller, V. L. & J. J. Mekalanos (1988) A novel suicide vector and its use in construction of insertion mutations: Osmoregulation of outer membrane proteins and virulence determinants in *vibrio cholerae* requires *toxR*. *J Bacteriol* **170**: 2575-2583.
- Relman, D. A., M. Domenighini, E. T. Tuomanen, R. Rappuoli & S. Falkow (1989) Filamentous hemagglutinin of *bordetella pertussis* : Nucleotide sequence and crucial role in adherence. *Proc. Natl. Acad. Sci. USA* **86**: 2634-2641.
